# Supplementary material
Source: publisher figshare collection journal article supplement (https://wiley.figshare.com/articles/dataset/_/3513431)
Supplement: Supplementary file 1 [file 1]

*Ecological Archives A017-091-A3*

**E. E. Holmes, L. W. Fritz, A. E. York, and K. Sweeney. 2007. Age-structured modeling reveals long-term declines in the natality of western Steller sea lions. *Ecological Applications* 17:2214-2232.**

## Appendix C. Life-history matrices.

The structure of the 32 x 32 female-only age-structured life-history matrix for Steller sea lions ( $\mathbf{A}$  in Eq. 3 in the main text) is shown in Table 1 (main text). The matrix is a birth-pulse Leslie matrix where row 1 column  $i$  is the number of 1-month old pups produced by age  $i+1$  females multiplied by the survival rate from age  $i$  to age  $i+1$ . Thus when the matrix multiplication,  $\mathbf{N}_{t+1} = \mathbf{A} \cdot \mathbf{N}_t$ , is performed, the first element of  $\mathbf{N}_{t+1}$  is the female pup numbers (at 1-month of age) in year  $t+1$ . Pups at age of 1-month are termed “age 0”. Rows  $i$ ,  $i > 1$ , in the matrix contain the survivorships from age  $i-1$  to  $i$ , along the diagonal. The  $s_i$  and  $f_i$  terms in  $\mathbf{A}$  have been estimated different ways in different published studies based on data from 1975 to 1978 on Marmot Island. These different estimates give rise to the four different life-history matrices that are compared in this study. Three of these matrices, **WT**, **CP** and **Y** are from previously published analyses. We made some slight modifications to these published matrices. First, a linearly increasing juvenile survivorship pattern was used for all matrices so that  $s_0$ , which is age 0-1 survival, was specified and then  $s_1$  and  $s_2$  were determined by a linear interpolation between  $s_0$  and  $s_3$  survival. Second, we explicitly included neonate survivorship. The number of female 1-month old pups produced by females of age  $i$ , was set equal to the late-term pregnancy rate,  $f_i$ , times 0.5 to get female fetuses only, multiplied by  $s_n$ , the neonate survivorship from late-term fetus to age 1-month when the pup survey occurs. This  $s_n$  was estimated as 0.949 from the average of the fraction of dead pups observed during the 1978 and 1979 pup counts in the CGOA: 492 (dead) to 6720 (live) in 1978 and 526 (dead) to 14763 (live) in 1978. The other  $s_i$  and  $f_i$  terms, which specify the survivorship and fecundity schedule for each matrix, were the same as in the published matrices and are shown in [Table C1](#). The final  $\mathbf{A}$  matrix is given by putting the  $s_i$  and  $f_i$  terms in [Table C1](#) into Table 1 in the main text. For reference, each  $\mathbf{A}$  matrix is supplied as tab delimited files in the [supplement](#).

*A matrix based on Calkins and Pitcher (1982) – CP matrix*

For this matrix, the survivorships,  $s_i$ , were those estimated originally by Calkins and Pitcher (1982) as presented

in their Table 24. These estimates are from the age-distribution observed in the longitudinal sample of Steller sea lions around Marmot Island in the 1970s, which was done by shooting a random sample of animals from the population. Given their smaller size and lack representation near rookeries, individuals younger than 3 years were not equally sampled and were excluded from the analyses. Age was determined by counting the enamel layers in cross-sections of the canine teeth, and pregnancy rates were determined from pregnancies observed in the sampled females. The survivorships in [Table C1](#) are taken from York (1994) Table 1 with the exception of  $s_0$ ,  $s_1$  and  $s_2$ . Juvenile survivorship could not be estimated directly from the data. Instead, York (1994) and Calkins and Pitcher (1982), set juvenile survivorship such that the resulting matrix would be stable (maximum eigenvalue equals 1.0). York (1994) made juvenile survivorship equal for the 1<sup>st</sup> three years while Calkins and Pitcher (1982) had juvenile survivorship increasing with age. In this analysis, we used Calkins and Pitcher's method, which eliminates a sudden jump from older juvenile survival to young adult survival. Thus  $s_1$  and  $s_2$  increase linearly from  $s_0$  towards  $s_3$ , and  $s_0$  is set so that the matrix is stable. Late-term pregnancy rate,  $f_i$ , is based on 'percent mature' x 'birth rate' in Table 26 in Calkins and Pitcher (1982) x 0.5 pup sex ratio. 'birth rate' reported in Calkins and Pitcher (1982) is not actually birth rate, however, rather it is late-term pregnancy rate. The  $f_i$  given in [Table C1](#) are from Table 1 in York (1994). Note that the age or  $i$  column in both York (1994) and Calkins and Pitcher (1982) is confusing since it signifies the age at which females become pregnant; they do not give birth until the next year. Early maturing females first become mature at age 3 but give birth at age 4, so  $f_i$  is 0 for age 0-3. The **CP** matrix is provided in the tab delimited text file, CP\_matrix.txt, in the [supplement](#).

*A generic Steller sea lion matrix based on Calkins and Pitcher (1982) – **WT** matrix*

Winship and Trites (2006) used a very generic model of Steller sea lions based on the Calkins and Pitcher survivorship and fecundity schedules. The matrix has high adult survivorship, lower age 1-3 survivorship, and a uniform late-term pregnancy rate after age 5 ([Table C1](#)). For this study, we changed juvenile survivorship so that juvenile survivorship increased linearly from  $s_0$  to  $s_3$  as for the other matrices. No animals are allowed to live beyond age 20 in the **WT** matrix. The **WT** matrix is provided in the tab delimited text file, WT\_matrix.txt, in the [supplement](#).

*Matrix based on York (1994)'s re-analysis of survivorship rates – **Y** matrix*

The Calkins and Pitcher (1982) survivorships result in an equilibrium age-distribution that does not precisely fit the observed age-distribution. York (1994) re-estimated the age-specific survivorships using a Weibull hazard model which is a standard model for survivorship. The re-estimated survivorships result in an age-distribution that closely matches the observed cumulative age-distribution in the 1975-1978 sample off Marmot Island.

[Table C1](#) gives the re-estimated survivorship schedule from Table 1 in York (1994).

There are two differences between the matrix used in this paper and the matrix published in York (1994) in Table 1 in that paper. York (1994) made juvenile survivorship equal for the 1<sup>st</sup> three years. Here, we used Calkins and Pitcher's method and allowed juvenile survivorship to increase with age. Thus  $s_1$  and  $s_2$  were set to increase linearly from  $s_0$  towards  $s_3$ , and  $s_0$  adjusted so that the matrix is stable. The second difference is in the  $f_i$  terms. In the matrix described in York (1994), females erroneously give birth the year that they become pregnant, whereas in actuality, females give birth the year after becoming pregnant. Thus the  $f_i$  terms should be shifted forward by one year. This same error appears in the matrix given in Holmes and York (2003). This error does not change the conclusions of either paper, although it does change slightly the estimated natality rate in Holmes and York (2003). The **Y** matrix is provided in the tab delimited text file, Y\_matrix.txt, in the [supplement](#).

#### *Matrix based on a re-analysis of the pregnancy rates – HFYS matrix*

For this paper, we re-analyzed the pregnancy data from the late-1970s Marmot samples. This analysis is discussed in the main text. The resulting fecundity schedule includes fecundity senescence and fits the observed late-term pregnancy data better. The survivorship schedule is the same as for the York (1994) matrix. The **HFYS** matrix is provided in the tab delimited text file, HFYS\_matrix.txt, in the [supplement](#).

## REFERENCES

- Calkins, D. G., and K. W. Pitcher. 1982. Population assessment, ecology and trophic relationships of Steller sea lions in the Gulf of Alaska. Final Report 17, U.S. Department of Commerce, Washington, D. C.
- Holmes, E. E., and A. E. York. 2003. Using age structure to detect impacts on threatened populations: a case study using Steller sea lions. *Conservation Biology* **17**:1794-1806.
- Winship, A. J., and A. W. Trites. 2006. Risk of extirpation of Steller sea lions in the Gulf of Alaska and Aleutian Islands: a population viability analysis based on alternative hypotheses for why sea lions declined in Western Alaska. *Marine Mammal Science* **23**:124-155.

York, A. E. 1994. The population dynamics of northern sea lions, 1975–1985. *Marine Mammal Science* **10**:38–51.

Table C1. Fecundity and survivorships terms used in the four life-history matrices. Matrix codes refer to matrices based on different papers: **WT** (Winship and Trites 2006), **CP** (Calkins and Pitcher 1982), **Y** (York 1994), and **HFYS** (this paper). In all matrices,  $s_n = 0.949$ . This table is provided as a tab delimited text file, tableC1.txt, in the [supplement](#).

| $i$ | $f_i$ | $f_i$               | $f_i$               | $f_i$               | $s_i$               | $s_i$               | $s_i$               | $s_i$               |
|-----|-------|---------------------|---------------------|---------------------|---------------------|---------------------|---------------------|---------------------|
| age | WT    | CP                  | Y                   | HFYS                | WT                  | CP                  | Y                   | HFYS                |
| 0*  | 0     | 0                   | 0                   | 0                   | 0.8001 <sup>3</sup> | 0.7625 <sup>3</sup> | 0.7895 <sup>3</sup> | 0.8060 <sup>3</sup> |
| 1   | 0     | 0                   | 0                   | 0                   | 0.8334 <sup>3</sup> | 0.7977 <sup>3</sup> | 0.8364 <sup>3</sup> | 0.8474 <sup>3</sup> |
| 2   | 0     | 0                   | 0                   | 0                   | 0.8667 <sup>3</sup> | 0.8328 <sup>3</sup> | 0.8833 <sup>3</sup> | 0.8888 <sup>3</sup> |
| 3   | 0     | 0                   | 0                   | 0                   | 0.9                 | 0.8680 <sup>1</sup> | 0.9302 <sup>1</sup> | 0.9302 <sup>1</sup> |
| 4   | 0     | 0.1008 <sup>1</sup> | 0.1008 <sup>1</sup> | 0.0480 <sup>2</sup> | 0.9                 | 0.8790              | 0.9092              | 0.9092              |
| 5   | 0     | 0.17955             | 0.17955             | 0.1695              | 0.9                 | 0.8880              | 0.8951              | 0.8951              |
| 6   | 0.315 | 0.26145             | 0.26145             | 0.2215              | 0.9                 | 0.8930              | 0.8839              | 0.8839              |
| 7   | 0.315 | 0.315               | 0.315               | 0.27950             | 0.9                 | 0.8980              | 0.8746              | 0.8746              |
| 8   | 0.315 | 0.315               | 0.315               | 0.3285              | 0.9                 | 0.8740              | 0.8665              | 0.8665              |
| 9   | 0.315 | 0.315               | 0.315               | 0.3285              | 0.9                 | 0.8990              | 0.8593              | 0.8593              |
| 10  | 0.315 | 0.315               | 0.315               | 0.3285              | 0.9                 | 0.8930              | 0.8527              | 0.8527              |
| 11  | 0.315 | 0.315               | 0.315               | 0.385               | 0.9                 | 0.8960              | 0.8468              | 0.8468              |
| 12  | 0.315 | 0.315               | 0.315               | 0.385               | 0.9                 | 0.8950              | 0.8412              | 0.8412              |
| 13  | 0.315 | 0.315               | 0.315               | 0.385               | 0.9                 | 0.8950              | 0.8360              | 0.8360              |
| 14  | 0.315 | 0.315               | 0.315               | 0.385               | 0.9                 | 0.8950              | 0.8312              | 0.8312              |
| 15  | 0.315 | 0.315               | 0.315               | 0.385               | 0.9                 | 0.8950              | 0.8266              | 0.8266              |
| 16  | 0.315 | 0.315               | 0.315               | 0.385               | 0.9                 | 0.8950              | 0.8223              | 0.8223              |
| 17  | 0.315 | 0.315               | 0.315               | 0.2570              | 0.9                 | 0.8950              | 0.8182              | 0.8182              |
| 18  | 0.315 | 0.315               | 0.315               | 0.2570              | 0.9                 | 0.8950              | 0.8142              | 0.8142              |
| 19  | 0.315 | 0.315               | 0.315               | 0.2570              | 0.9                 | 0.8950              | 0.8105              | 0.8105              |

|    |       |       |       |        |   |        |        |        |
|----|-------|-------|-------|--------|---|--------|--------|--------|
| 20 | 0.315 | 0.315 | 0.315 | 0.2570 | 0 | 0.8950 | 0.8069 | 0.8069 |
| 21 | 0.315 | 0.315 | 0.315 | 0.2570 | 0 | 0.8950 | 0.8034 | 0.8034 |
| 22 | 0     | 0.315 | 0.315 | 00     | 0 | 0.8950 | 0.8001 | 0.8001 |
| 23 | 0     | 0.315 | 0.315 | 0      | 0 | 0.8950 | 0.7968 | 0.7968 |
| 24 | 0     | 0.315 | 0.315 | 0      | 0 | 0.8950 | 0.7937 | 0.7937 |
| 25 | 0     | 0.315 | 0.315 | 0      | 0 | 0.8950 | 0.7907 | 0.7907 |
| 26 | 0     | 0.315 | 0.315 | 0      | 0 | 0.8950 | 0.7878 | 0.7878 |
| 27 | 0     | 0.315 | 0.315 | 0      | 0 | 0.8950 | 0.7850 | 0.7850 |
| 28 | 0     | 0.315 | 0.315 | 0      | 0 | 0.8950 | 0.7822 | 0.7822 |
| 29 | 0     | 0.315 | 0.315 | 0      | 0 | 0.8950 | 0.7795 | 0.7795 |
| 30 | 0     | 0.315 | 0.315 | 0      | 0 | 0.8950 | 0.7769 | 0.7769 |
| 31 | 0     | 0.315 | 0.315 | 0      | 0 | 0      | 0      | 0      |

$f_i$  is the fraction of age  $i$  females with late-term pregnancies  $\times 0.5$  to get female fetuses only (note age  $i$  females mate and become impregnated at age  $i-1$ ).  $s_i$  is the survivorship from age  $i$  to  $i+1$ .

\* age 0 denotes 1-month of age which is the age of pups when the survey occurs.

1. Table 1 from York (1994). Note that in Table 1 (York 1994) the age ‘To’ column represents the numbering for  $f_i$ , whereas the age ‘From’ column represents the numbering for  $s_i$ .
2. Re-estimated in this paper from the original 1970s data. See main text.
3.  $s_1$  and  $s_2$  increase linearly from  $s_0$  towards  $s_3$ , and  $s_0$  is set so that the dominant eigenvalue of the matrix is equal to 1 (meaning a stable population).
